# Supplementary material for: Synthesis of long Poly(dA)·Poly(dT) DNA without structural defects using enzymatic reaction; Tailored ligated Poly(dA)·Poly(dT)
Source: Royal Society of Chemistry journal article supplement (doi:10.1039/b205821a), 2002-01-01
Supplement: b205821a.pdf [file b205821a.pdf]

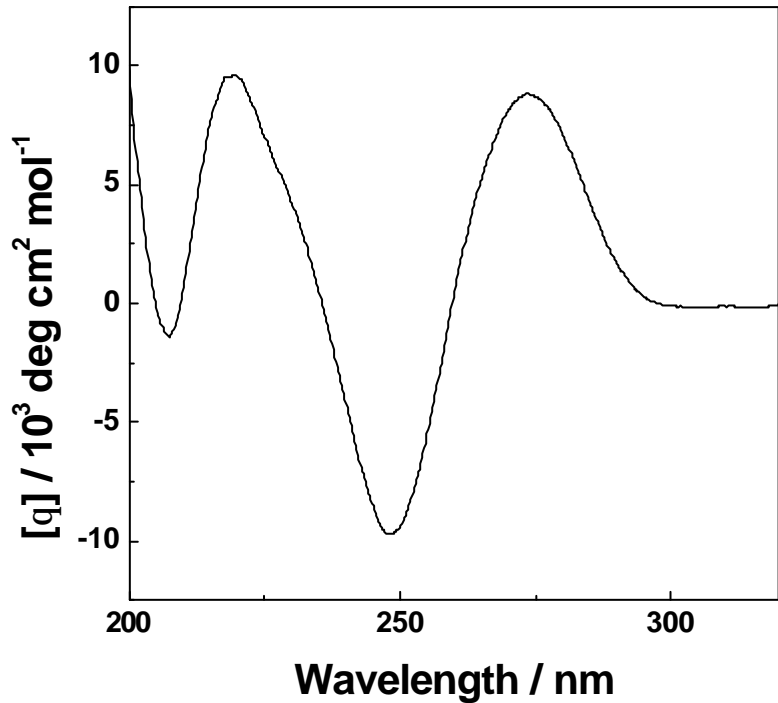

The circular dichroism (CD) spectrum of tailored ligated Poly(dA)·Poly(dT) in the presence of 20 mM Na<sup>+</sup> at 25 °C. Concentration of DNA was 40 mM (pH=7.0).

Since the curve of the spectrum shows symmetrical shape at the center point of 260 nm, Tailored ligated Poly(dA)·Poly(dT) has a B-form structure.
